# Supplementary material for: Biophysical analysis of Plasmodium falciparum Hsp70-Hsp90 organising protein (PfHop) reveals a monomer that is characterised by folded segments connected by flexible linkers
Source: PubMed Central journal article supplement (PMC7188212; doi:10.1371/journal.pone.0226657), 2020-04-28
Supplement: pone.0226657.s004.pdf [file pone.0226657.s004.pdf]

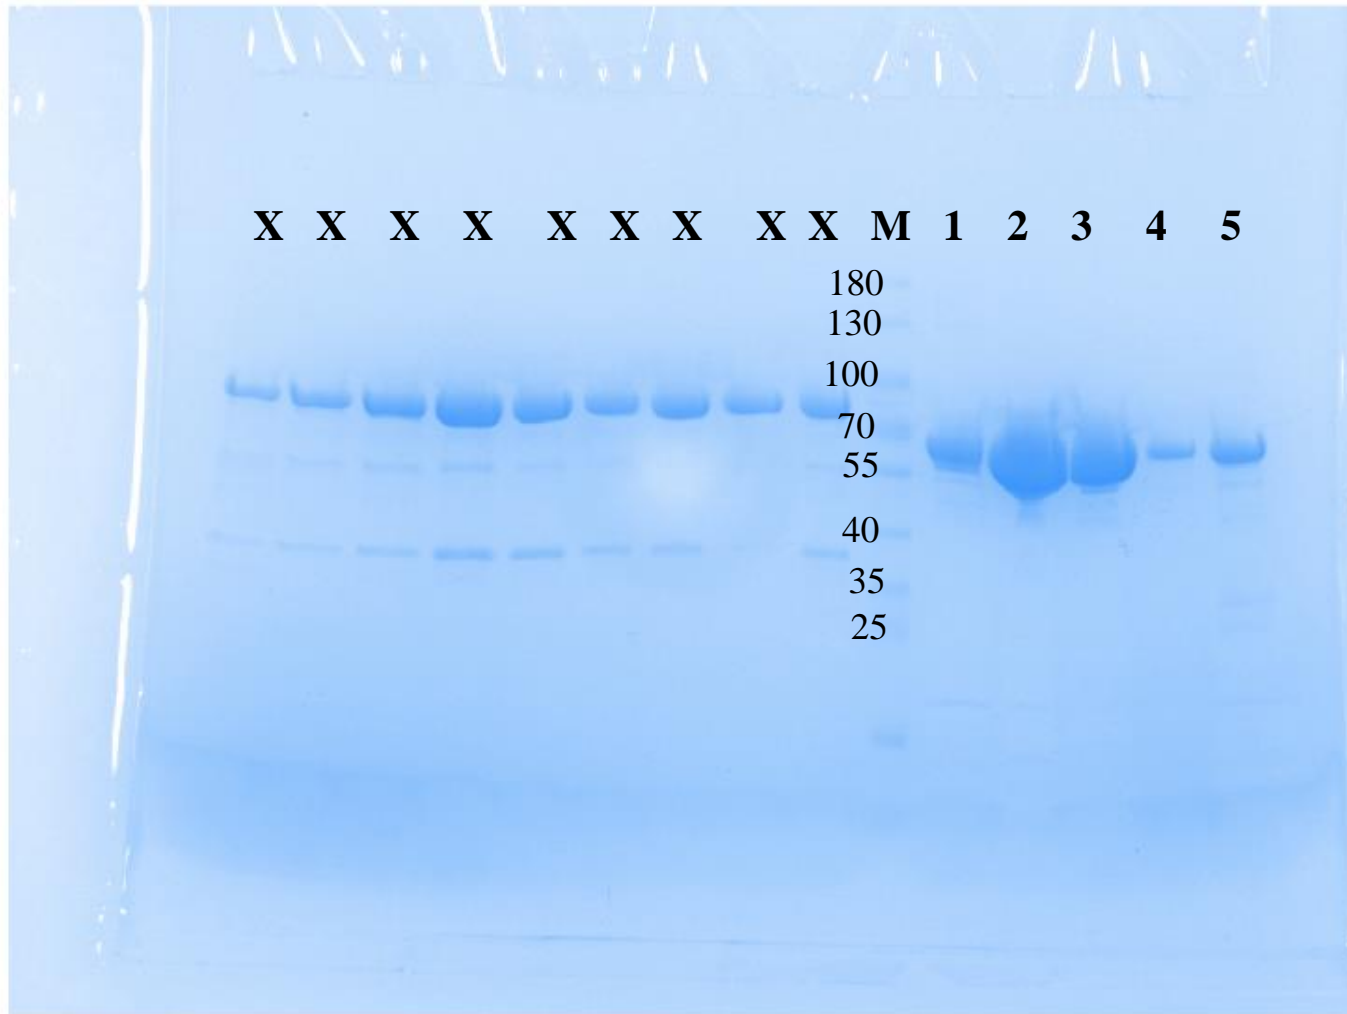

**Figure S1A. SDS-PAGE analysis of PfHop fractions obtained after ion exchange chromatography**

Lane M: Molecular weight markers (in kDa); Lanes 1-5: PfHop fractions

This image contributed towards supplementary Figure S1A

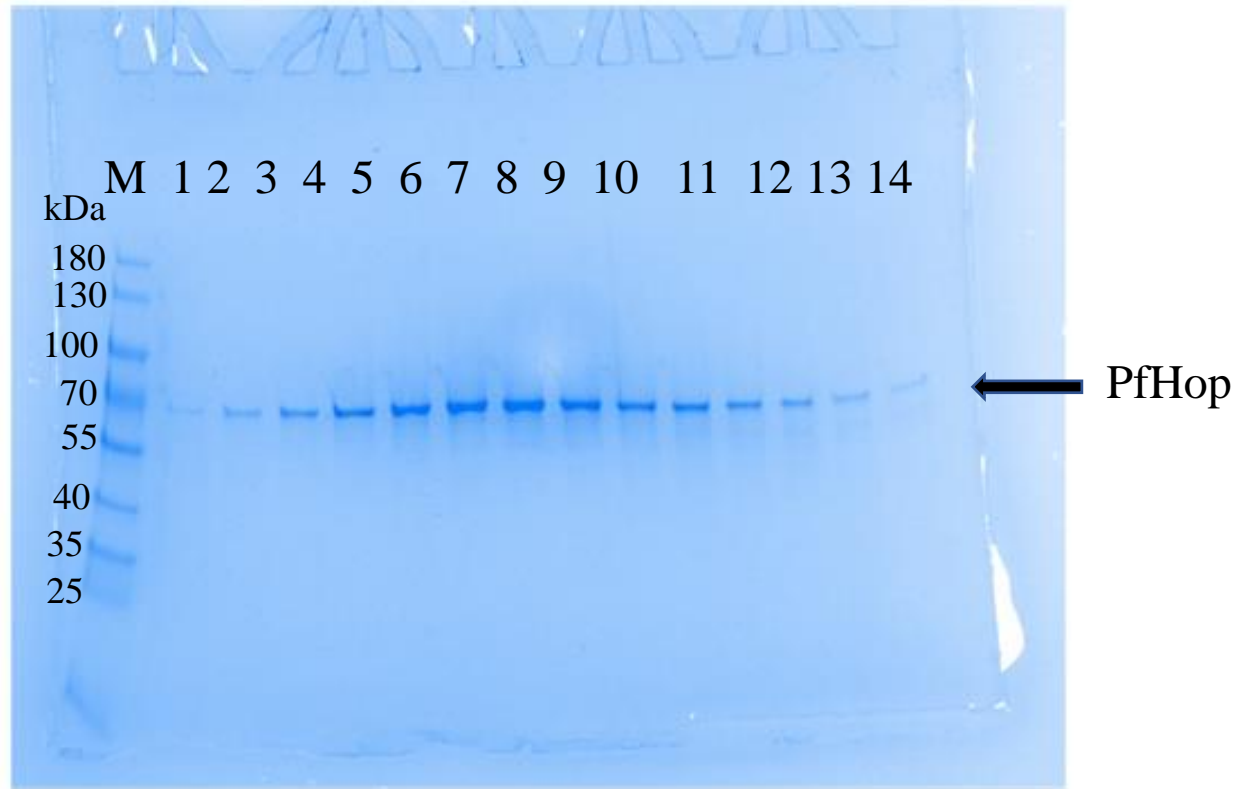

**Figure S1B. SDS-PAGE analysis of PfHop fractions obtained by gel filtration**  
Lane M: Molecular weight markers in kDa; Lanes 1-14: PfHop fractions

This image contributed towards supplementary Figure S1B.

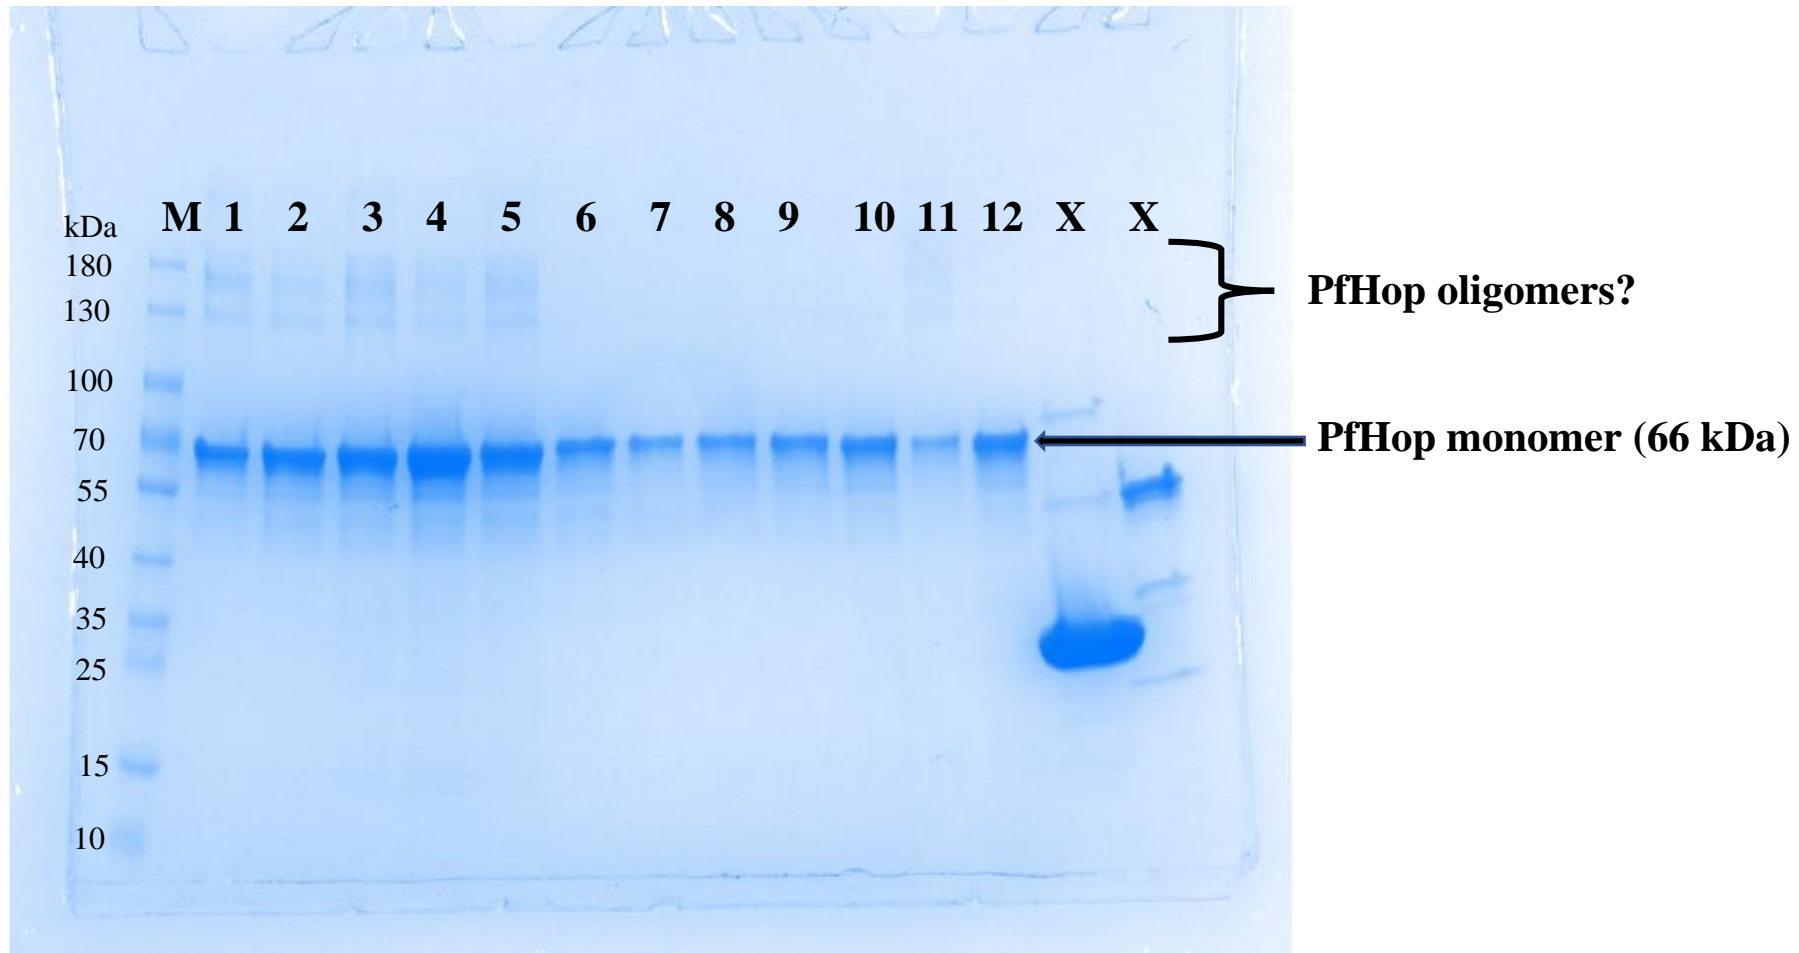

**Figure S1C. SDS-PAGE analysis of more PfHop fractions obtained after gel filtration**

Lane M: Molecular weight markers (in kDa); lanes 1-12: additional PfHop fractions obtained after gel filtration

This image contributed towards Figure S1C.
